# Supplementary material
Source: MDPI journal article supplement (https://www.mdpi.com/2072-4292/14/16/3854)
Supplement: s1 [file s1]

### PCA Corner Plots

The compound ratio of vegetation and buildings were projected onto the first 4 PCA components as described in the main text, and a linear model of air quality parameters was fit to the amplitudes of each component as a function of time. Applying MCMC modelling, we obtain the full posterior distribution of air quality parameters for both vegetation and buildings for each component and present those distributions and model in the figures below.

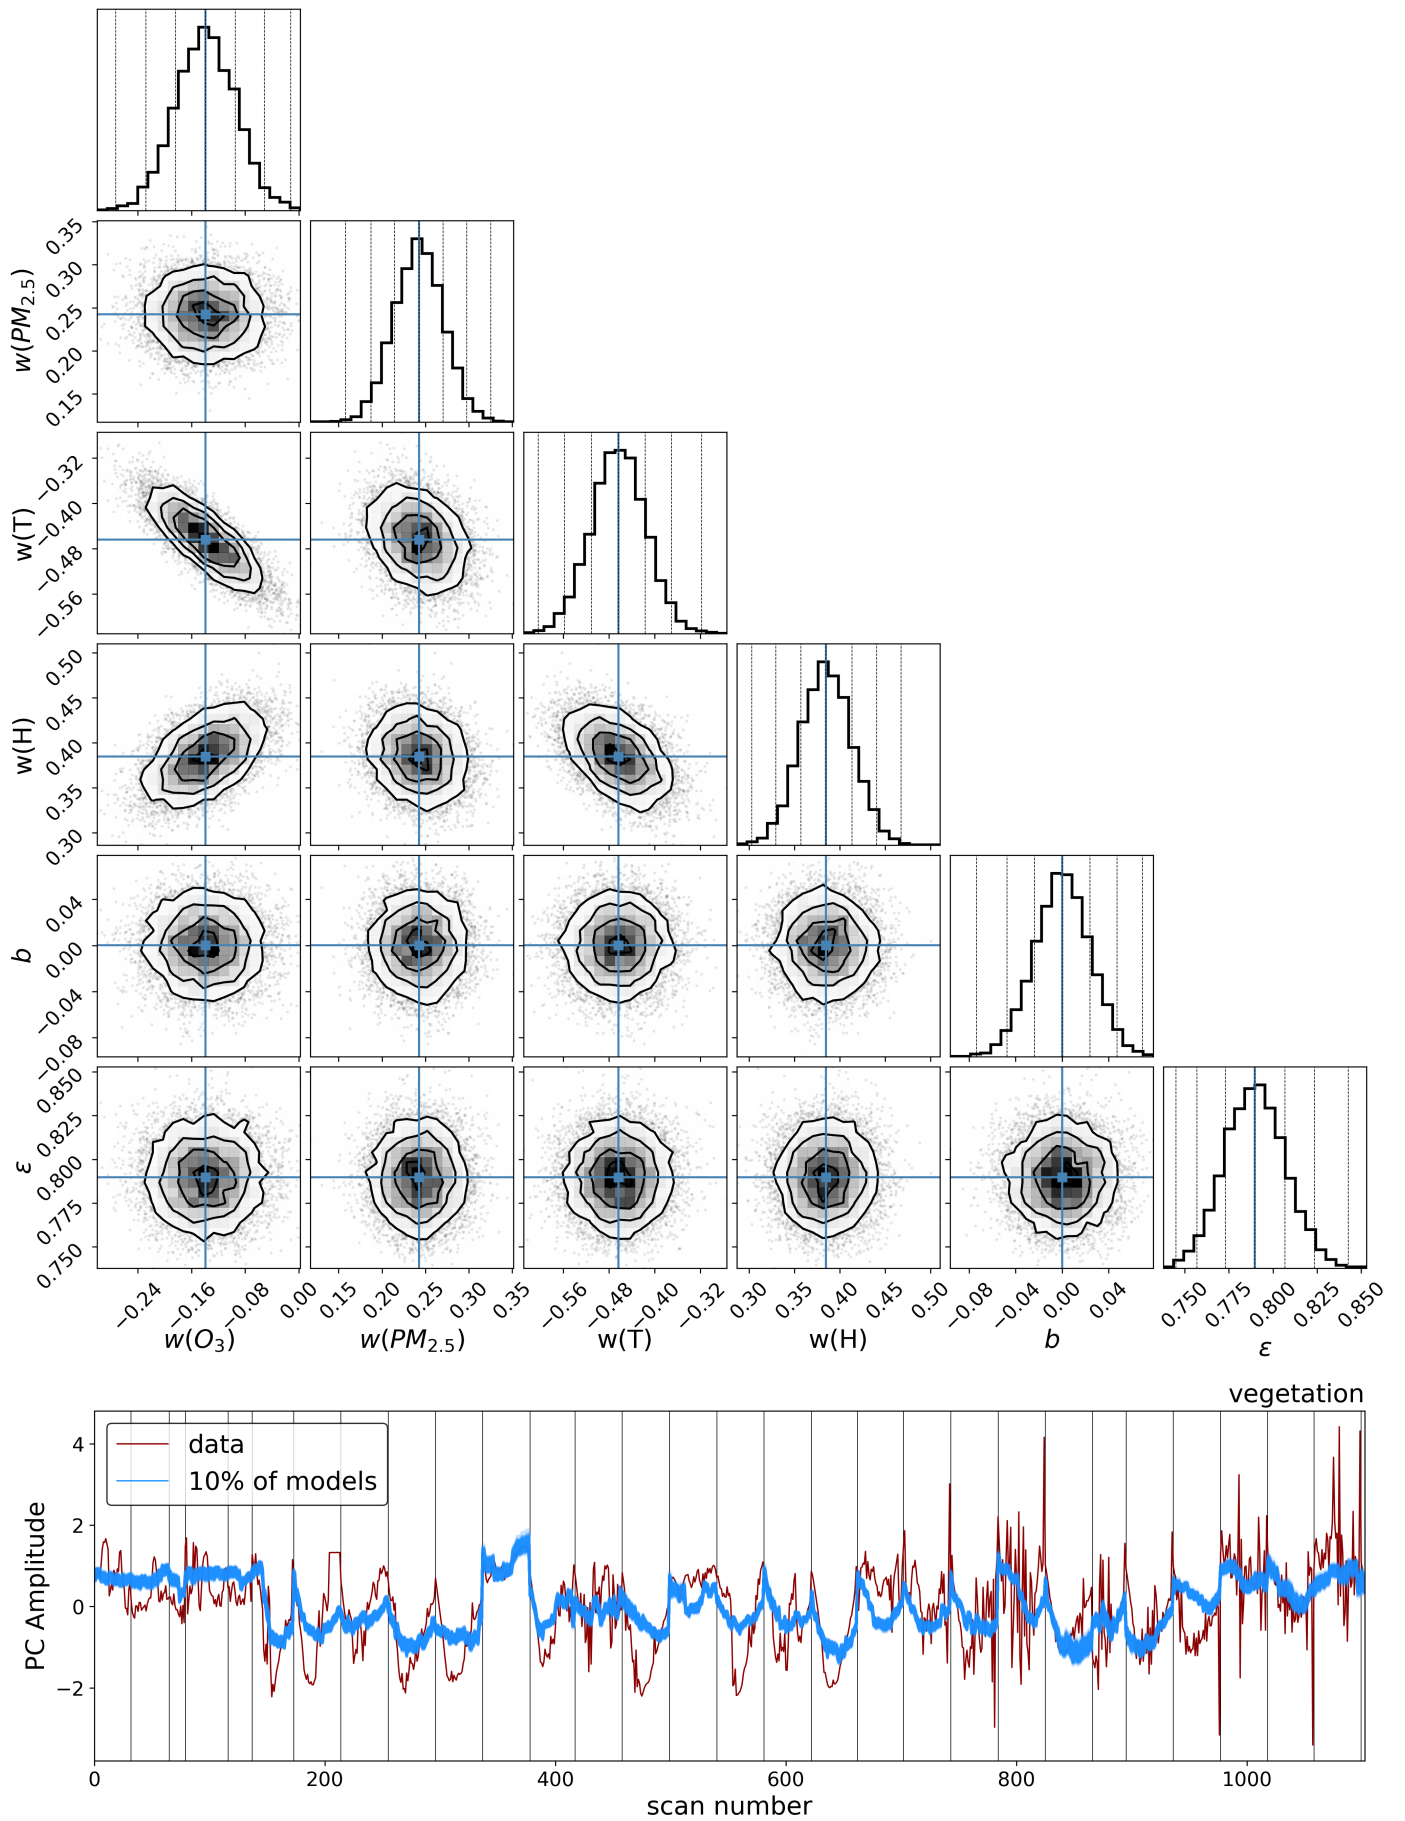

**Figure S1.** MCMC corner plot of posterior distribution for PCA component 1 of vegetation

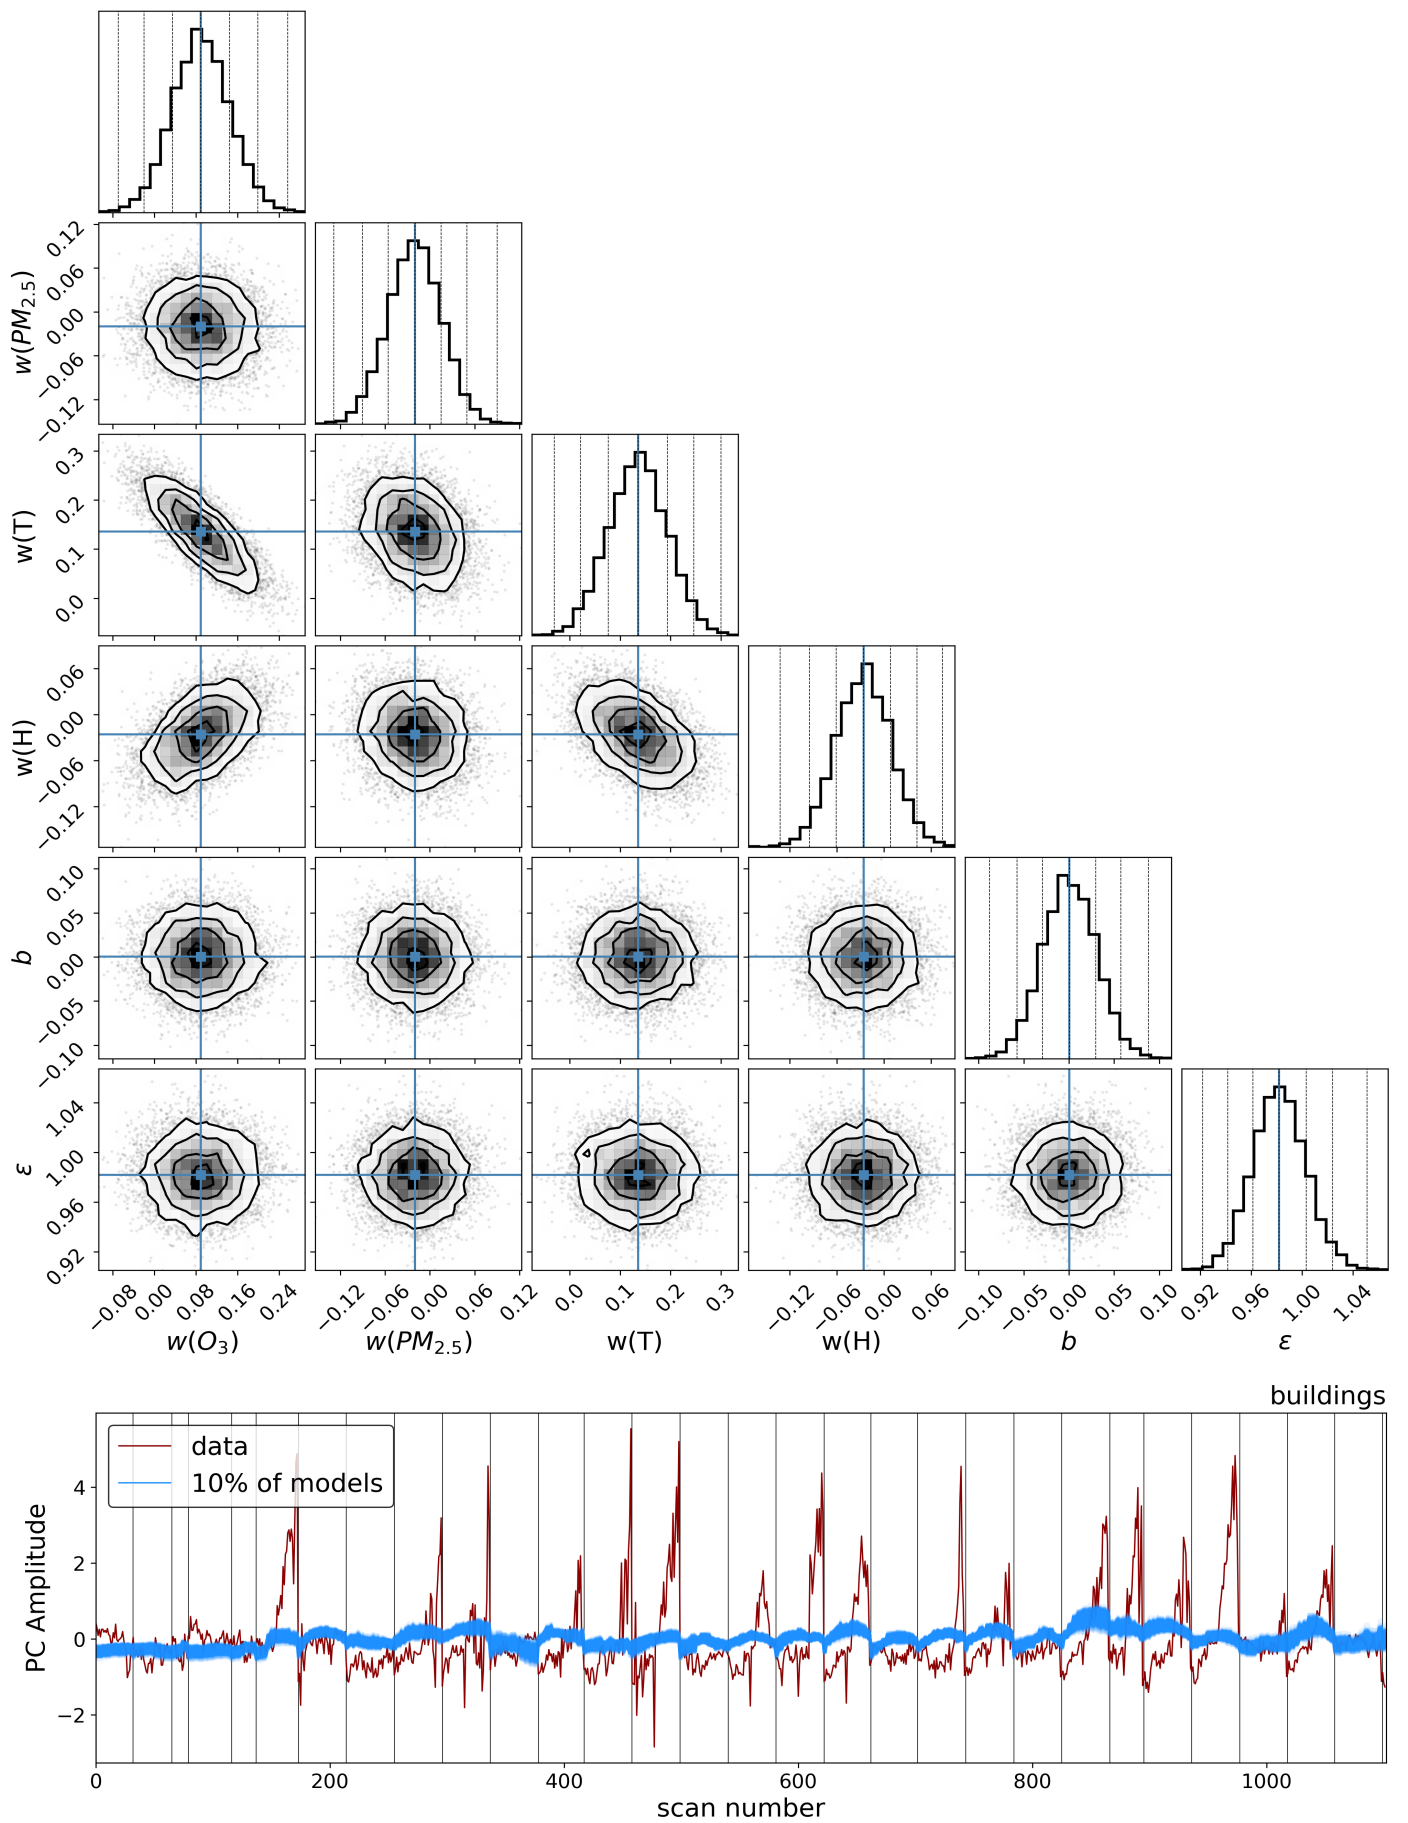

**Figure S2.** MCMC corner plot of posterior distribution for PCA component 1 of the buildings

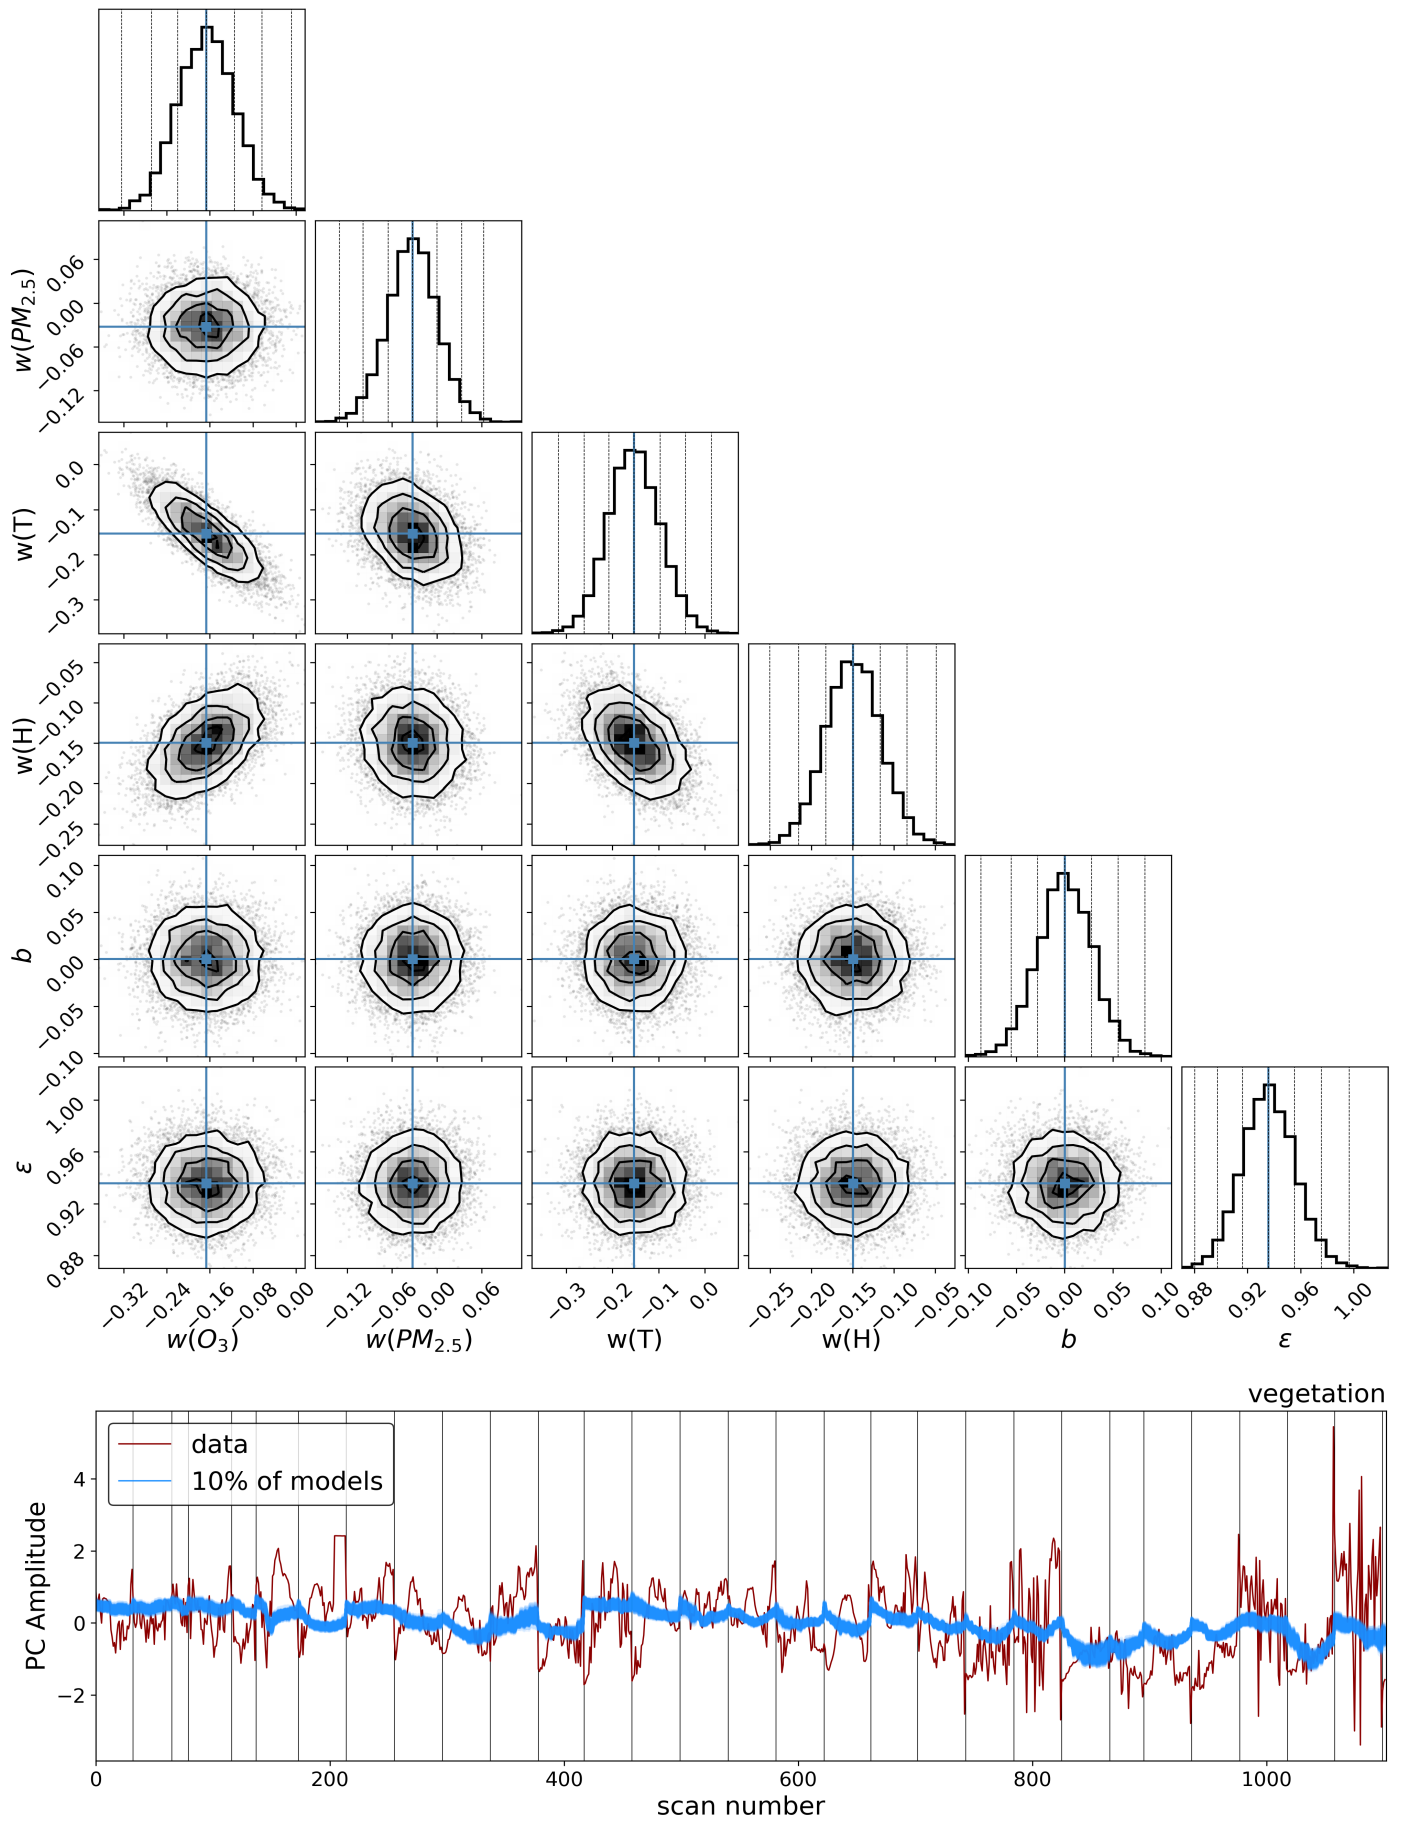

**Figure S3.** MCMC corner plot of posterior distribution for PCA component 2 of vegetation



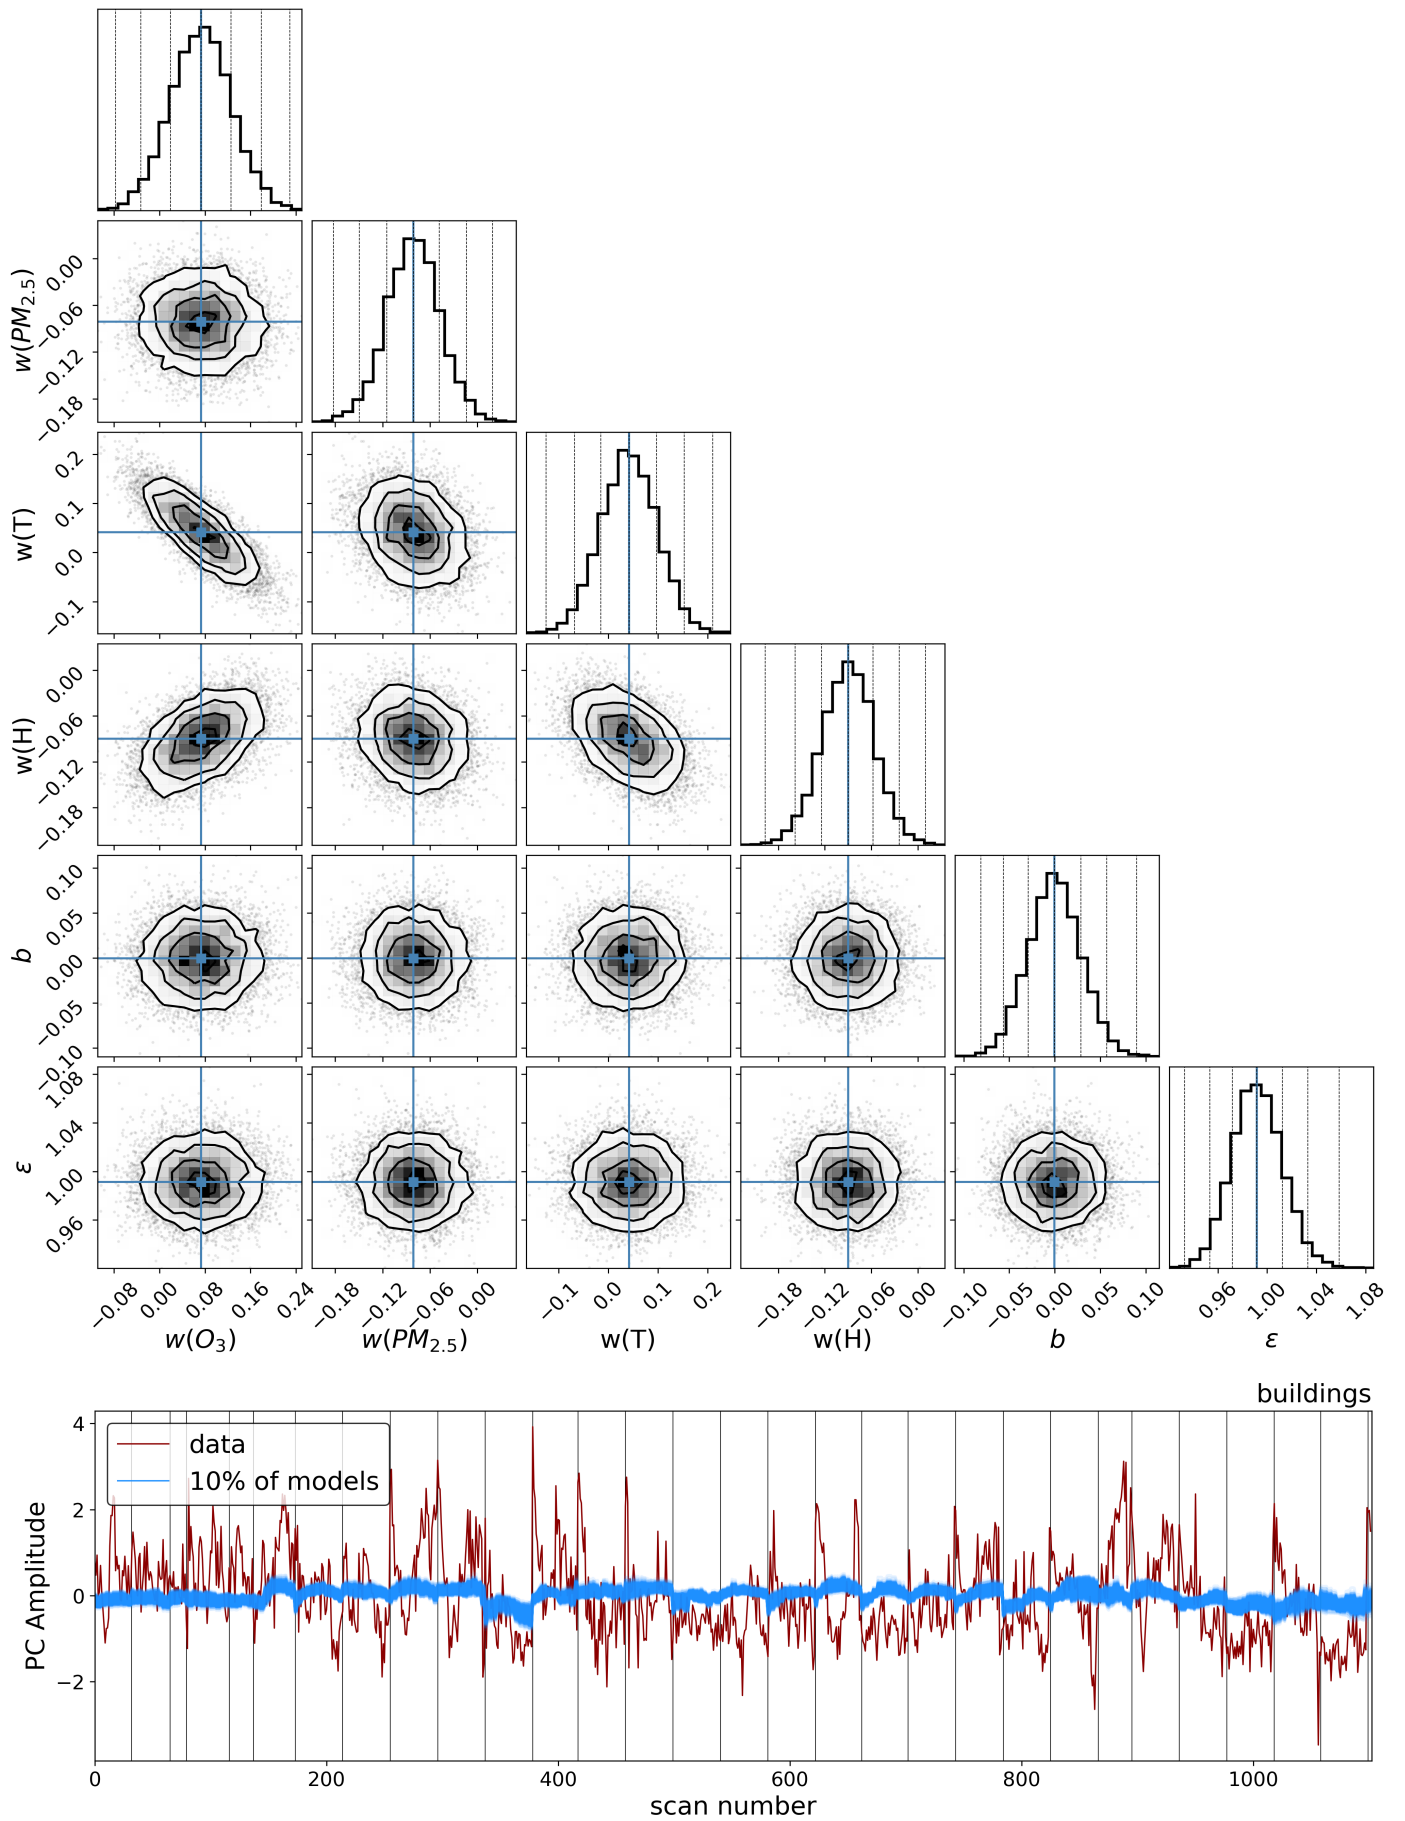

**Figure S4.** MCMC corner plot of posterior distribution for PCA component 2 of the buildings

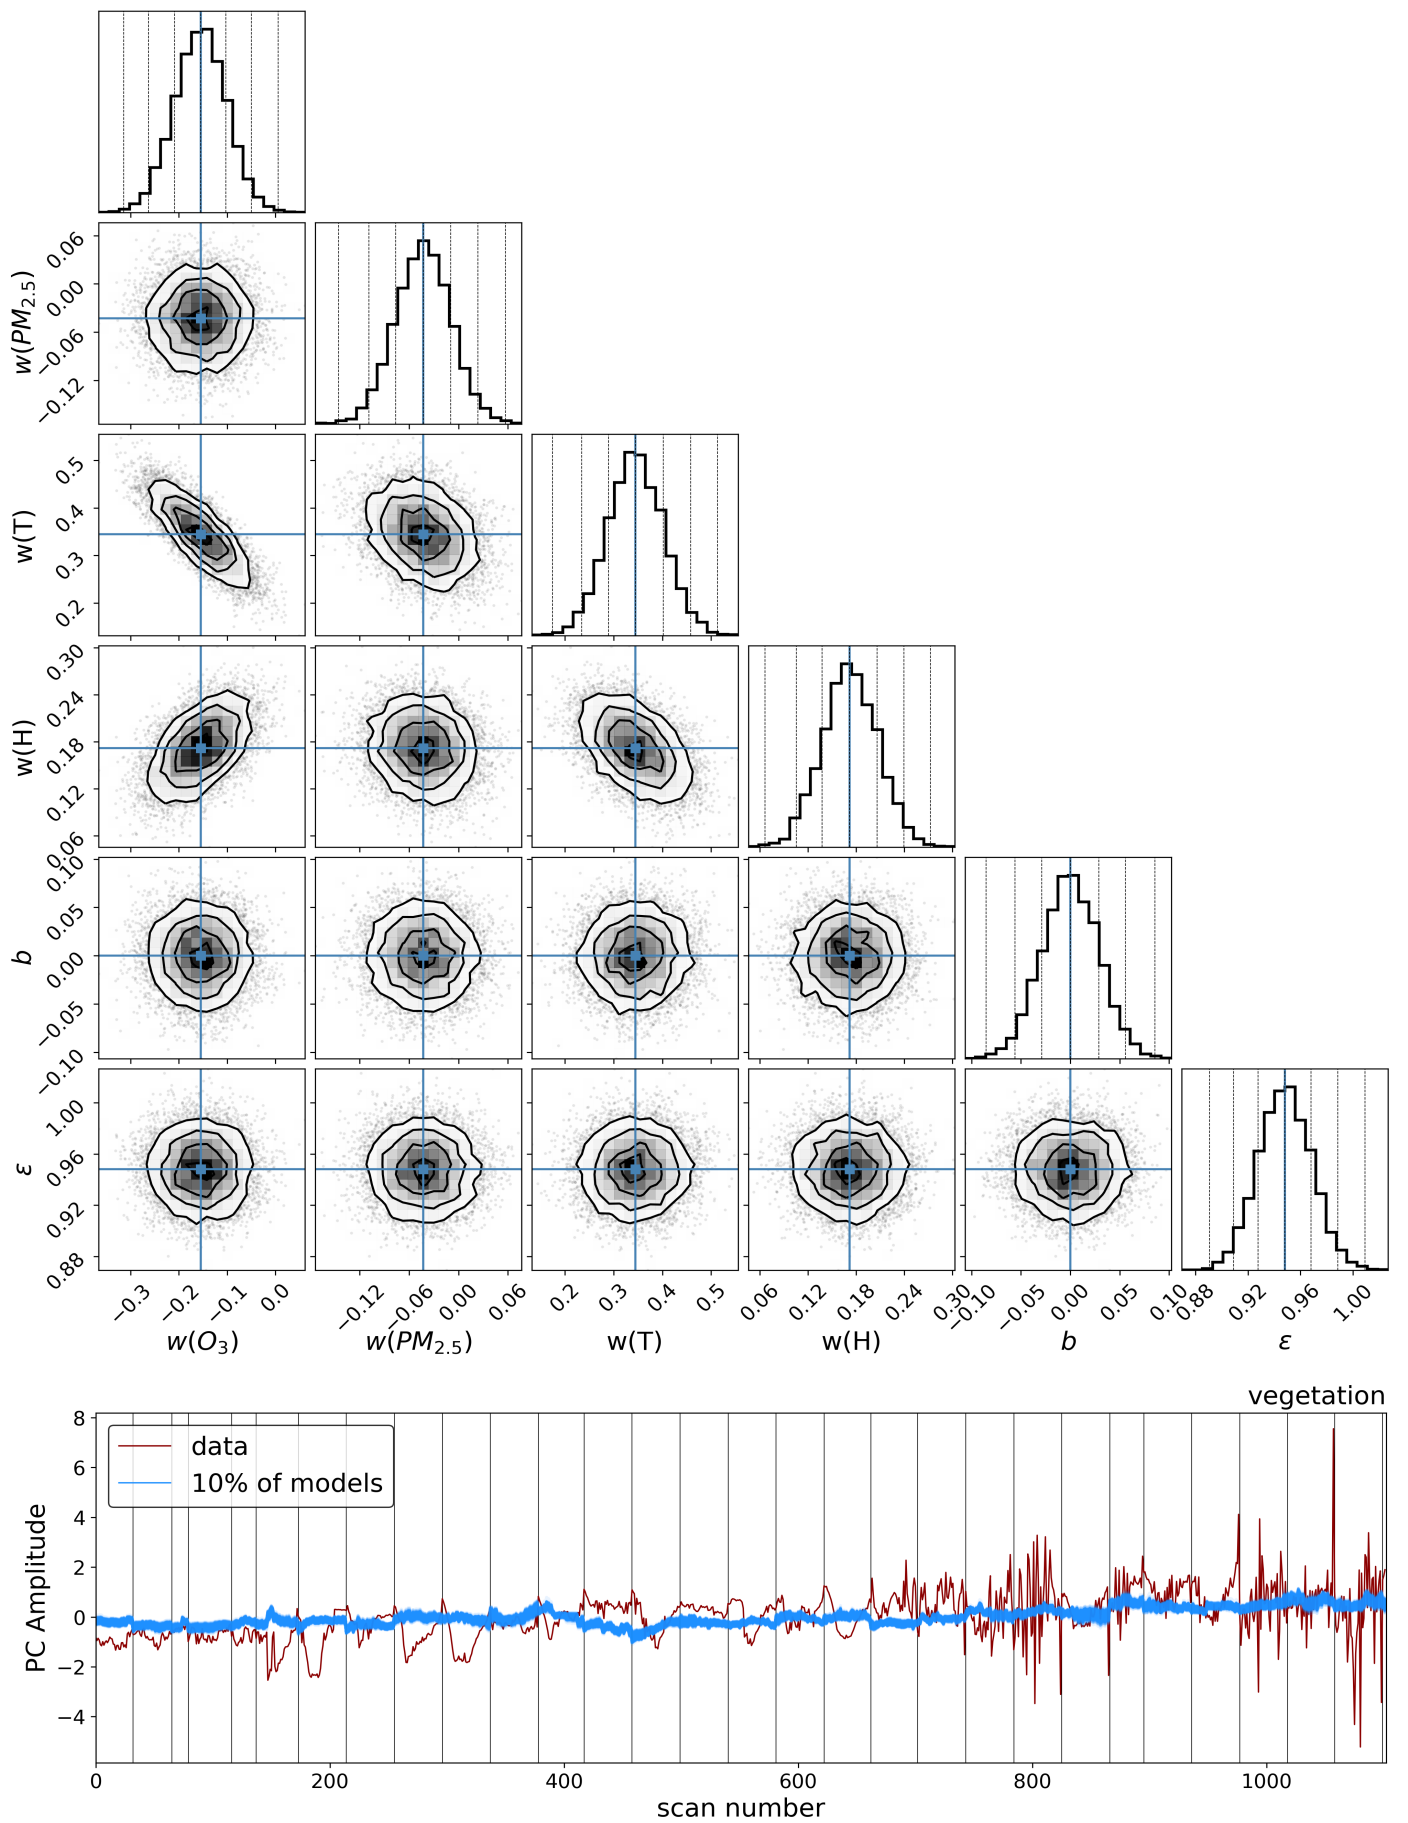

**Figure S5.** MCMC corner plot of posterior distribution for PCA component 3 of vegetation

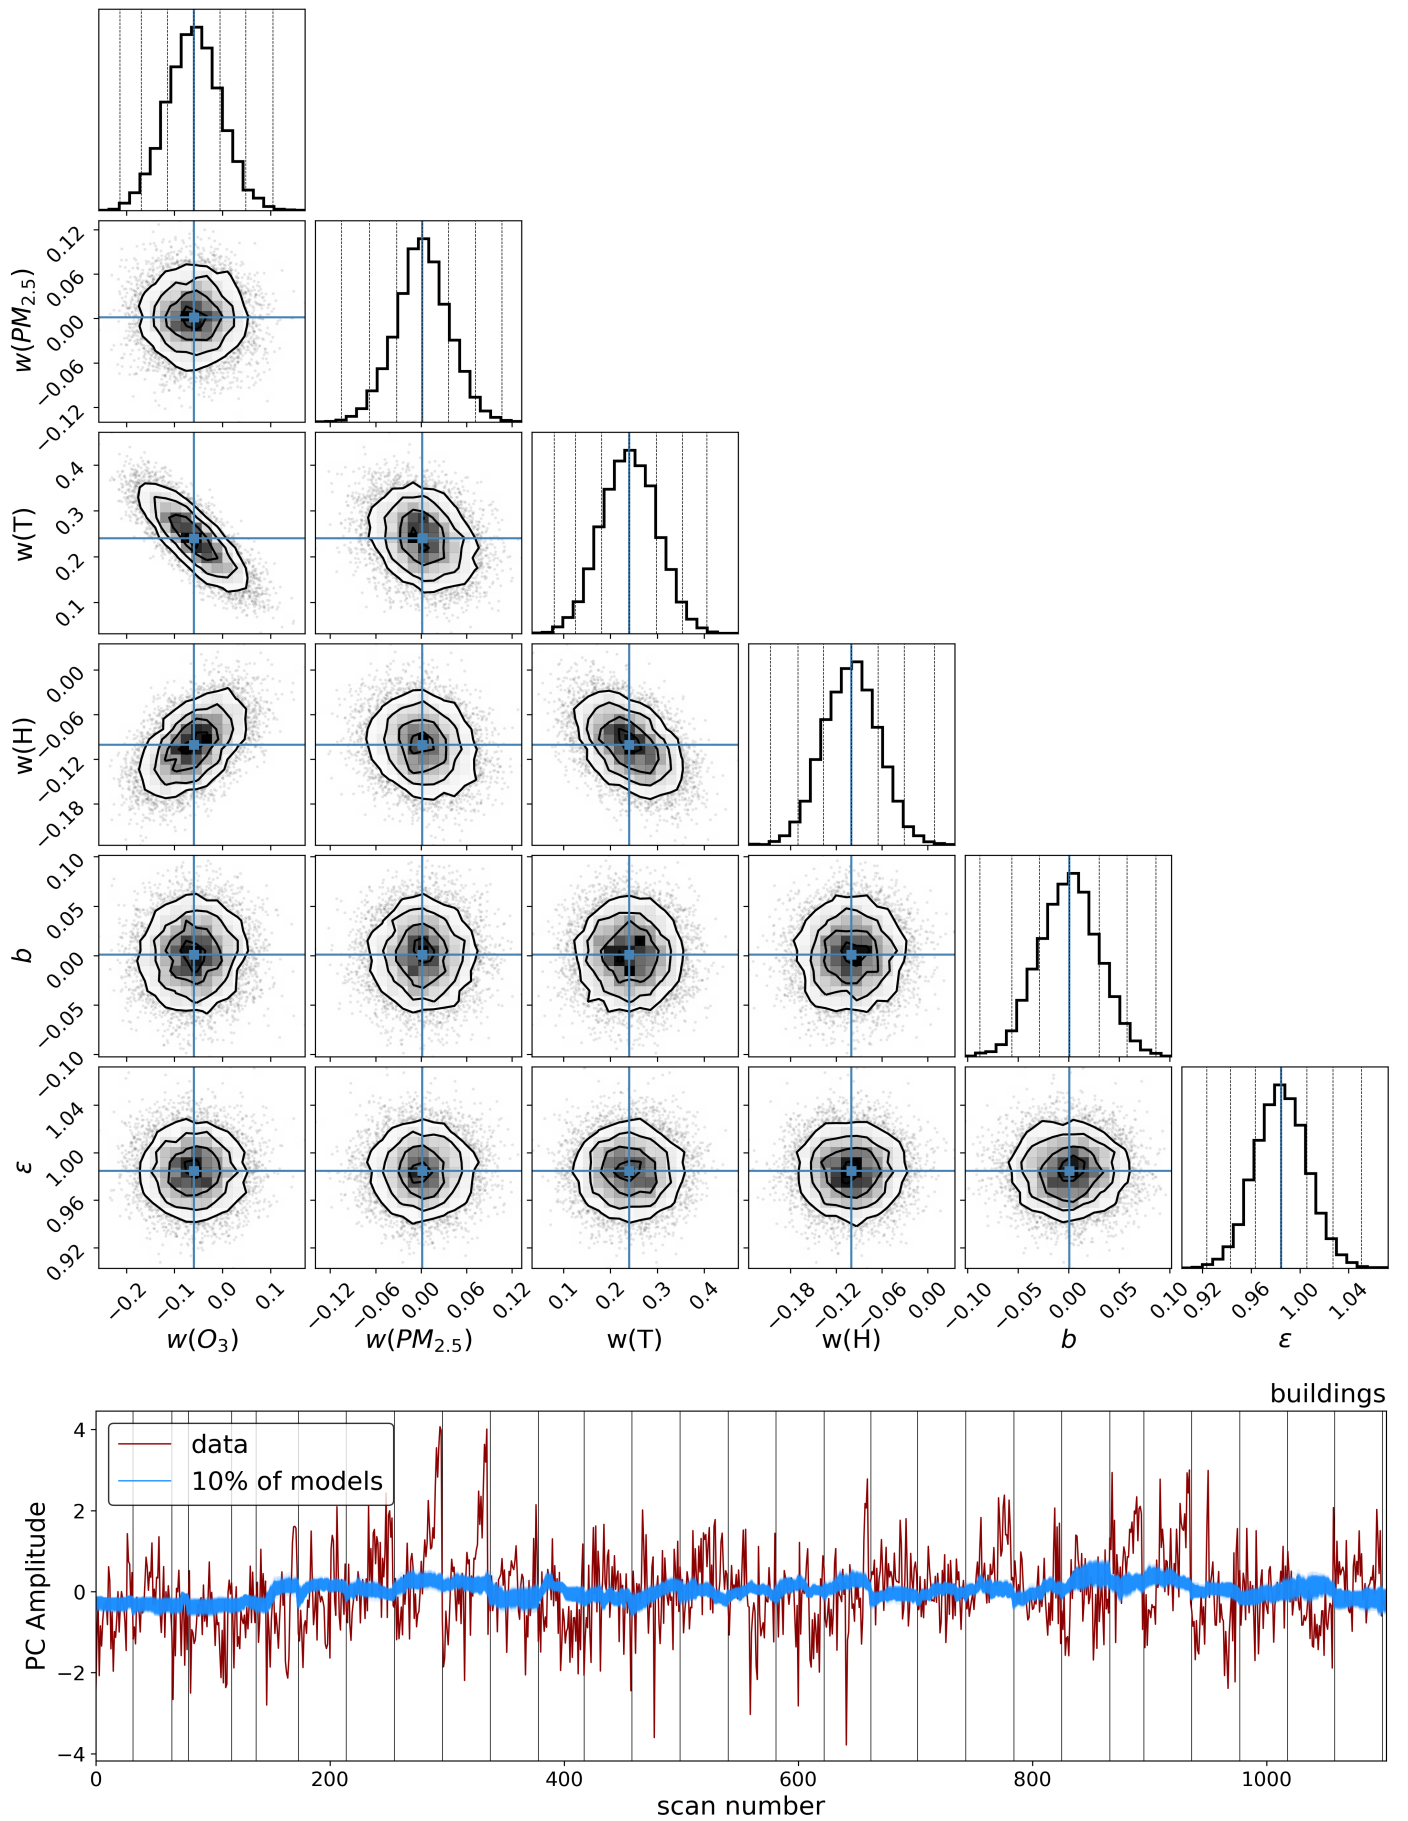

**Figure S6.** MCMC corner plot of posterior distribution for PCA component 3 of the buildings

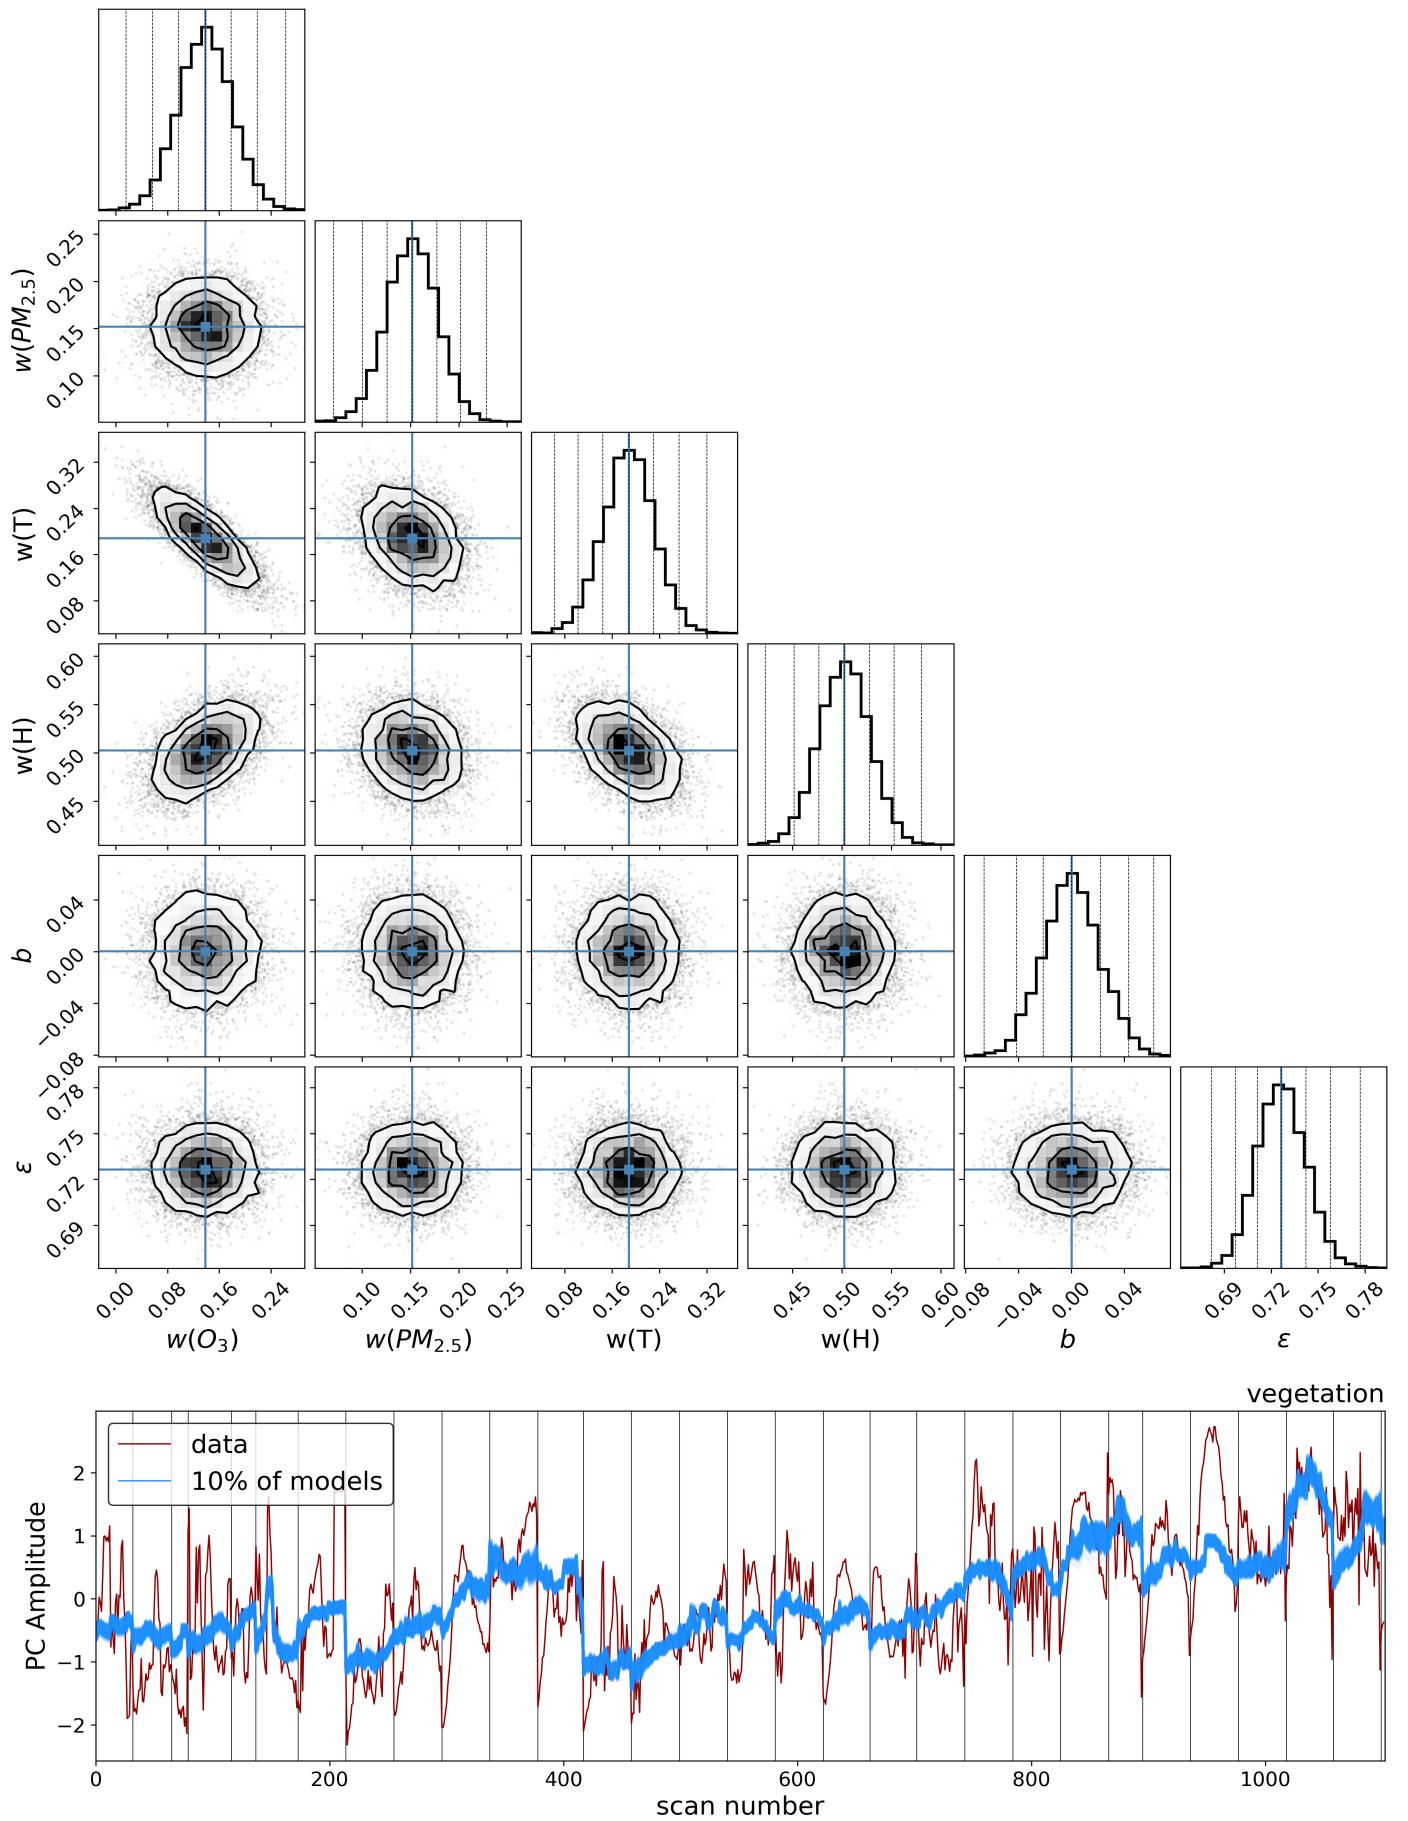

**Figure S7.** MCMC corner plot of posterior distribution for PCA component 4 of vegetation

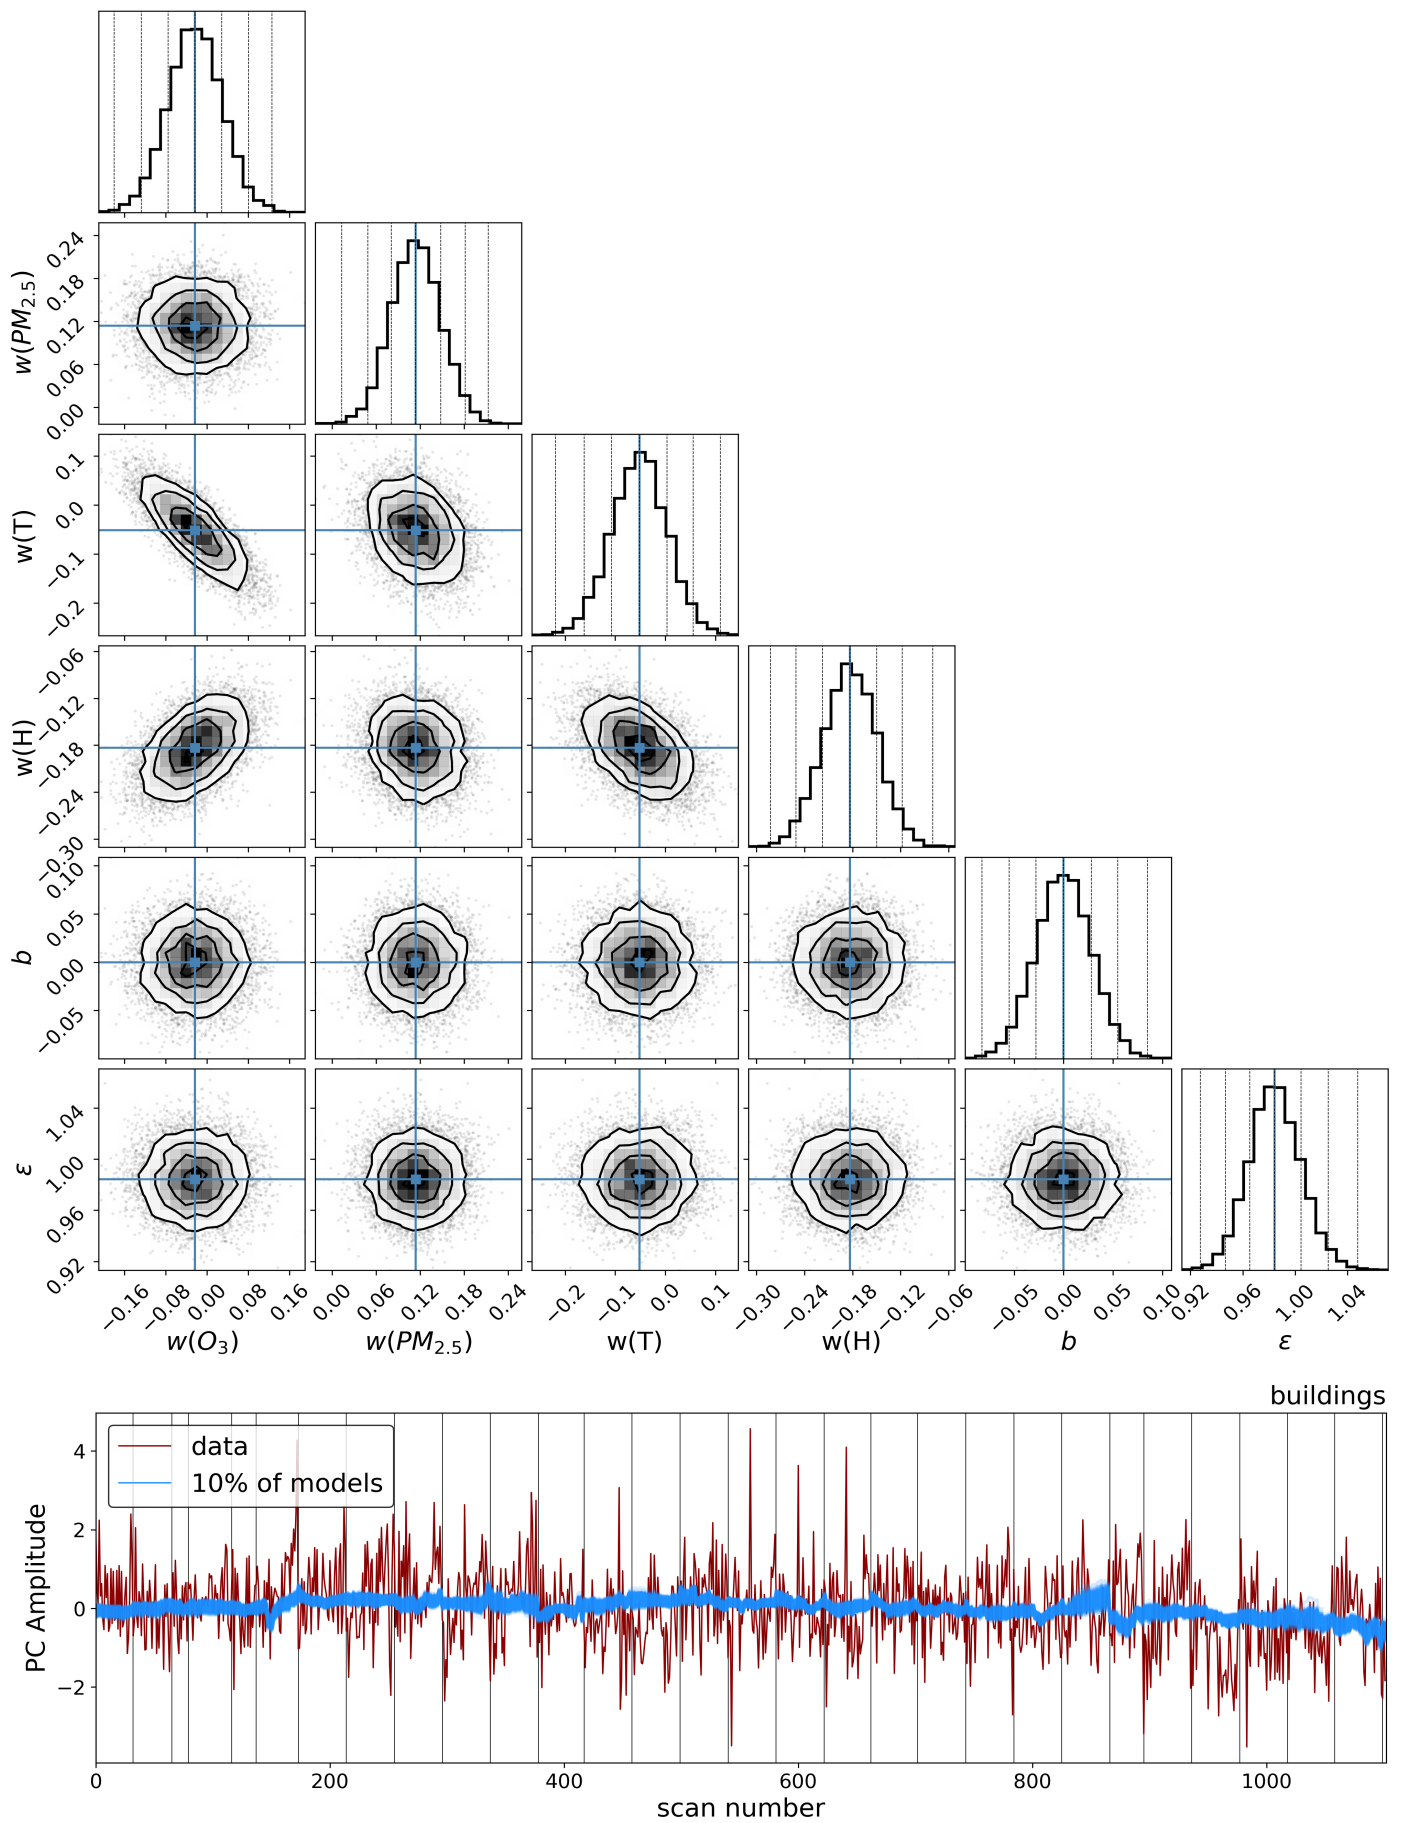

**Figure S8.** MCMC corner plot of posterior distribution for PCA component 4 of the buildings
